# Supplementary material
Source: PubMed Central journal article supplement (PMC8837708)
Supplement: NIHMS1756188-supplement-1.pdf [file NIHMS1756188-supplement-1.pdf]

## **Supplemental Text to Describe Methods:**

### *Clinical variables:*

Patient demographics, socioeconomic status, clinical characteristics, diagnostic method, treatment facility, geographic region, tumor, nodes, and metastases (TNM) staging, and treatment types were extracted from the NCDB. Demographic information included age, sex, race, and ethnicity. Socioeconomic status included insurance status and type of insurance, household income, level of education, and geographic classifications of metropolitan, urban, or rural. Household income (median household income for the patient's zip code) and level of education (median percentage of adults ages 25 or older without a high school degree in the patient's zip code) were based on 2016 American Community Survey data. Clinical characteristics included the Charlson/Deyo Comorbidity Score (0, 1, 2, or  $\geq 3$ ) and Model for End-stage Liver Disease (MELD) score, cirrhosis (Ishak fibrosis score 5-6). Diagnostic methods included histology/cytology and clinical diagnosis. Treatment facilities were categorized geographically in the US (Northeast, Midwest, South, West) and were classified as academic ( $> 500$  new cancer diagnoses annually and at least four postgraduate training programs), comprehensive community ( $> 500$  new cancer diagnoses annually), community (100 to 500 new cancer diagnoses annually), and integrated network (no minimum caseload, joint venture with multiple facilities providing integrated cancer care with at least one facility being a hospital and a CoC-accredited cancer program).

### *Statistical analysis:*

Study variables were summarized using standard descriptors such as frequency/percentage for categorical variables and median interquartile range (IQR) or mean standard deviation for continuous variables. The Pearson's chi-square test, Welch's t-test, and Wilcoxon-Mann-Whitney test were used for bivariate comparisons where appropriate. Univariate and multivariable logistic regression modeling was performed to determine factors associated with elevated serum AFP levels. The chained equation approach for multiple imputations was used prior to performing the logistic regression to account for missing data in the NCDB.<sup>1</sup> In order to provide a more intuitive interpretation of the temporal trend of increased AFP, we

estimated the percent of elevated AFP using marginal effects, also known as the average predicted probability, from a logistic regression model.<sup>2</sup> The interaction term between diagnosis year and TNM stage was included in the logistic regression model for pair-wise comparisons in the temporal trend of increased AFP level among different TNM stages. This computation was repeated using the overall sample with complete AFP data and subsample by race/ethnicity. All statistical analyses were performed using R statistical software (version 4.0.5; R Foundation, Vienna, Austria) with two-sided tests and a significance level of 0.05.

## References

1. White IR, Royston P, Wood AM. Multiple imputation using chained equations: Issues and guidance for practice. *Stat Med* 2011;30:377-99.
2. Lüdtke D (2021). sjPlot: Data Visualization for Statistics in Social Science. R package version 2.8.8, <https://CRAN.R-project.org/package=sjPlot>.

**Supplemental Table 1. Baseline patient characteristics by AFP**

| Characteristic                         | AFP Level              |                           |                             |         | Elevated AFP               |                          |         |
|----------------------------------------|------------------------|---------------------------|-----------------------------|---------|----------------------------|--------------------------|---------|
|                                        | Overall<br>N = 133,542 | AFP Missing<br>N = 25,189 | AFP Reported<br>N = 108,353 | p-value | Elevated AFP<br>N = 67,853 | Normal AFP<br>N = 40,500 | p-value |
| Age Mean (SD)                          | 64 (11)                | 65 (11)                   | 64 (10)                     | < 0.001 | 64 (10)                    | 64 (10)                  | < 0.001 |
| Sex                                    |                        |                           |                             | 0.011   |                            |                          | 0.906   |
| Male                                   | 101,938 (76%)          | 19,072 (76%)              | 82,866 (77%)                |         | 51,901 (76%)               | 30,965 (76%)             |         |
| Female                                 | 31,604 (24%)           | 6,117 (24%)               | 25,487 (24%)                |         | 15,952 (24%)               | 9,535 (24%)              |         |
| Race/Ethnicity                         |                        |                           |                             | < 0.001 |                            |                          | < 0.001 |
| White                                  | 81,460 (63%)           | 15,437 (64%)              | 66,023 (63%)                |         | 39,299 (60%)               | 26,724 (68%)             |         |
| Hispanic                               | 16,797 (13%)           | 3,354 (14%)               | 13,443 (13%)                |         | 8,518 (13%)                | 4,925 (13%)              |         |
| Black                                  | 20,442 (16%)           | 3,528 (15%)               | 16,914 (16%)                |         | 12,188 (19%)               | 4,726 (12%)              |         |
| Asian + Other                          | 11,211 (8.6%)          | 1,990 (8.2%)              | 9,221 (8.7%)                |         | 6,040 (9.2%)               | 3,181 (8.0%)             |         |
| Insurance Status                       |                        |                           |                             | < 0.001 |                            |                          | < 0.001 |
| Uninsured                              | 7,481 (5.7%)           | 1,169 (4.8%)              | 6,312 (5.9%)                |         | 4,656 (7.0%)               | 1,656 (4.1%)             |         |
| Private                                | 38,950 (30%)           | 7,046 (29%)               | 31,904 (30%)                |         | 19,589 (29%)               | 12,315 (31%)             |         |
| Medicaid/Medicare                      | 82,003 (63%)           | 15,273 (63%)              | 66,730 (63%)                |         | 41,413 (62%)               | 25,317 (63%)             |         |
| Other                                  | 2,669 (2.0%)           | 797 (3.3%)                | 1,872 (1.8%)                |         | 1,163 (1.7%)               | 709 (1.8%)               |         |
| Median Income (quartiles)              |                        |                           |                             | 0.941   |                            |                          | < 0.001 |
| Less than \$40,227                     | 30,767 (25%)           | 5,854 (26%)               | 24,913 (25%)                |         | 16,604 (27%)               | 8,309 (23%)              |         |
| \$40,227 - \$50,353                    | 27,905 (23%)           | 5,263 (23%)               | 22,642 (23%)                |         | 14,522 (23%)               | 8,120 (23%)              |         |
| \$50,354 - \$63,332                    | 27,138 (22%)           | 5,154 (22%)               | 21,984 (22%)                |         | 13,887 (22%)               | 8,097 (23%)              |         |
| \$63,333 +                             | 35,265 (29%)           | 6,716 (29%)               | 28,549 (29%)                |         | 17,232 (28%)               | 11,317 (32%)             |         |
| No High School Degree (quartiles)      |                        |                           |                             | < 0.001 |                            |                          | < 0.001 |
| 17.6% or More                          | 37,356 (31%)           | 7,364 (32%)               | 29,992 (31%)                |         | 19,880 (32%)               | 10,112 (28%)             |         |
| 10.9%-17.5%                            | 33,156 (27%)           | 6,416 (28%)               | 26,740 (27%)                |         | 17,176 (28%)               | 9,564 (27%)              |         |
| 6.3%-10.8%                             | 29,671 (25%)           | 5,415 (24%)               | 24,256 (25%)                |         | 15,104 (24%)               | 9,152 (26%)              |         |
| Less than 6.3%                         | 21,124 (17%)           | 3,832 (17%)               | 17,292 (18%)                |         | 10,223 (16%)               | 7,069 (20%)              |         |
| Geographic Classification              |                        |                           |                             | 0.218   |                            |                          | 0.102   |
| Metropolitan                           | 112,597 (87%)          | 21,252 (87%)              | 91,345 (87%)                |         | 57,465 (87%)               | 33,880 (87%)             |         |
| Urban                                  | 15,136 (12%)           | 2,830 (12%)               | 12,306 (12%)                |         | 7,661 (12%)                | 4,645 (12%)              |         |
| Rural                                  | 1,738 (1.3%)           | 355 (1.5%)                | 1,383 (1.3%)                |         | 840 (1.3%)                 | 543 (1.4%)               |         |
| Facility Type                          |                        |                           |                             | < 0.001 |                            |                          | < 0.001 |
| Academic                               | 73,895 (56%)           | 11,726 (47%)              | 62,169 (58%)                |         | 36,466 (54%)               | 25,703 (64%)             |         |
| Community Cancer Program               | 6,622 (5.0%)           | 1,824 (7.3%)              | 4,798 (4.5%)                |         | 3,630 (5.4%)               | 1,168 (2.9%)             |         |
| Comprehensive Community Cancer Program | 34,773 (26%)           | 8,262 (33%)               | 26,511 (25%)                |         | 18,208 (27%)               | 8,303 (21%)              |         |
| Integrated Network                     | 16,659 (13%)           | 3,071 (12%)               | 13,588 (13%)                |         | 8,789 (13%)                | 4,799 (12%)              |         |
| US Region                              |                        |                           |                             | < 0.001 |                            |                          | < 0.001 |
| Northeast                              | 27,039 (21%)           | 4,959 (20%)               | 22,080 (21%)                |         | 13,299 (20%)               | 8,781 (22%)              |         |
| Midwest                                | 26,162 (20%)           | 3,755 (15%)               | 22,407 (21%)                |         | 13,740 (21%)               | 8,667 (22%)              |         |
| <b>Characteristic</b>                  | <b>AFP Level</b>       |                           |                             |         | <b>Elevated AFP</b>        |                          |         |

|                                    | <b>Overall</b><br><i>N = 133,542</i> | <b>AFP Missing</b><br><i>N = 25,189</i> | <b>AFP Reported</b><br><i>N = 108,353</i> | <b>p-value</b> | <b>Elevated AFP</b><br><i>N = 67,853</i> | <b>Normal AFP</b><br><i>N = 40,500</i> | <b>p-value</b> |
|------------------------------------|--------------------------------------|-----------------------------------------|-------------------------------------------|----------------|------------------------------------------|----------------------------------------|----------------|
| South                              | 53,104 (40%)                         | 11,780 (47%)                            | 41,324 (39%)                              |                | 26,767 (40%)                             | 14,557 (36%)                           |                |
| West                               | 25,644 (19%)                         | 4,389 (18%)                             | 21,255 (20%)                              |                | 13,287 (20%)                             | 7,968 (20%)                            |                |
| Charlson/Deyo<br>Comorbidity Score |                                      |                                         |                                           | < 0.001        |                                          |                                        | < 0.001        |
| 0 or 1                             | 97,227 (73%)                         | 19,896 (79%)                            | 77,331 (71%)                              |                | 49,524 (73%)                             | 27,807 (69%)                           |                |
| 2                                  | 12,409 (9.3%)                        | 2,034 (8.1%)                            | 10,375 (9.6%)                             |                | 6,005 (8.9%)                             | 4,370 (11%)                            |                |
| 3 or More                          | 23,906 (18%)                         | 3,259 (13%)                             | 20,647 (19%)                              |                | 12,324 (18%)                             | 8,323 (21%)                            |                |
| Diagnosis Method                   |                                      |                                         |                                           | < 0.001        |                                          |                                        | < 0.001        |
| Cytology or Histology              | 77,198 (58%)                         | 17,638 (70%)                            | 59,560 (55%)                              |                | 35,981 (53%)                             | 23,579 (58%)                           |                |
| Clinical Diagnosis                 | 56,344 (42%)                         | 7,551 (30%)                             | 48,793 (45%)                              |                | 31,872 (47%)                             | 16,921 (42%)                           |                |
| MELD<br>Median [IQR]               | 12 [8, 20]                           | 13 [8, 21]                              | 12 [8, 19]                                | < 0.001        | 12 [9, 20]                               | 11 [8, 17]                             | < 0.001        |
| Cirrhosis                          |                                      |                                         |                                           | < 0.001        |                                          |                                        | < 0.001        |
| No                                 | 6,673 (21%)                          | 847 (25%)                               | 5,826 (21%)                               |                | 3,074 (20%)                              | 2,752 (22%)                            |                |
| Yes                                | 24,736 (79%)                         | 2,536 (75%)                             | 22,200 (79%)                              |                | 12,597 (80%)                             | 9,603 (78%)                            |                |
| Tumor Size (cm)<br>Median [IQR]    | 4.2 [2.5, 7.4]                       | 4.2 [2.5, 7.4]                          | 4.2 [2.5, 7.4]                            | 0.994          | 5.0 [2.9, 8.4]                           | 3.40 [2.2, 5.6]                        | < 0.001        |
| TNM Stage                          |                                      |                                         |                                           | < 0.001        |                                          |                                        | < 0.001        |
| Stage 1                            | 44,757 (38%)                         | 8,304 (42%)                             | 36,453 (38%)                              |                | 17,741 (29%)                             | 18,712 (51%)                           |                |
| Stage 2                            | 24,306 (21%)                         | 3,463 (18%)                             | 20,843 (22%)                              |                | 11,921 (20%)                             | 8,922 (24%)                            |                |
| Stage 3                            | 25,120 (22%)                         | 3,554 (18%)                             | 21,566 (22%)                              |                | 16,320 (27%)                             | 5,246 (14%)                            |                |
| Stage 4                            | 22,342 (19%)                         | 4,249 (22%)                             | 18,093 (19%)                              |                | 14,448 (24%)                             | 3,645 (10%)                            |                |
| Treatment                          |                                      |                                         |                                           | < 0.001        |                                          |                                        | < 0.001        |
| No Treatment                       | 28,147 (22%)                         | 7,007 (29%)                             | 21,140 (20%)                              |                | 15,601 (24%)                             | 5,539 (14%)                            |                |
| Curative                           | 33,921 (26%)                         | 6,882 (29%)                             | 27,039 (26%)                              |                | 12,515 (19%)                             | 14,524 (37%)                           |                |
| Non-curative Treatment             | 67,665 (52%)                         | 10,256 (43%)                            | 57,409 (54%)                              |                | 38,172 (58%)                             | 19,237 (49%)                           |                |

MELD: Model for End-Stage Liver Disease; TNM: tumor, nodes, metastases

**Supplemental Table 2. Factors associated with elevated AFP**

| Characteristic                                  | Univariate          |         | Multivariable       |         |
|-------------------------------------------------|---------------------|---------|---------------------|---------|
|                                                 | Odds Ratio          | p-value | Odds Ratio          | p-value |
| Age (per 10 years)                              | 0.94 (0.93 to 0.95) | < 0.001 | 0.96 (0.95 to 0.98) | < 0.001 |
| Female Sex (Ref: Male)                          | 1.00 (0.97 to 1.03) | 0.900   | 1.11 (1.08 to 1.15) | < 0.001 |
| Race/Ethnicity (Ref: White)                     |                     |         |                     |         |
| Black                                           | 1.74 (1.67 to 1.80) | < 0.001 | 1.59 (1.53 to 1.66) | < 0.001 |
| Hispanic                                        | 1.17 (1.13 to 1.22) | < 0.001 | 1.11 (1.06 to 1.16) | < 0.001 |
| Asian + Other                                   | 1.29 (1.22 to 1.34) | < 0.001 | 1.30 (1.24 to 1.36) | < 0.001 |
| Insurance Status (Ref: No insurance)            |                     |         |                     |         |
| Private Insurance                               | 0.57 (0.54 to 0.61) | < 0.001 | 0.81 (0.76 to 0.87) | < 0.001 |
| Medicaid/Medicare                               | 0.59 (0.55 to 0.62) | < 0.001 | 0.81 (0.76 to 0.86) | < 0.001 |
| Other Insurance                                 | 0.59 (0.53 to 0.65) | < 0.001 | 0.83 (0.74 to 0.92) | 0.001   |
| Median Income (quartiles) (Ref: <\$40,227)      |                     |         |                     |         |
| \$40,227 - \$50,353                             | 0.90 (0.86 to 0.92) | < 0.001 | 0.99 (0.95 to 1.03) | 0.721   |
| \$50,354 - \$63,332                             | 0.86 (0.82 to 0.88) | < 0.001 | 0.98 (0.93 to 1.02) | 0.352   |
| \$63,333 +                                      | 0.77 (0.74 to 0.79) | < 0.001 | 0.95 (0.90 to 0.99) | 0.025   |
| No High School Degree (quartiles) (Ref: >17.5%) |                     |         |                     |         |
| 10.9%-17.5%                                     | 0.91 (0.88 to 0.94) | < 0.001 | 0.98 (0.95 to 1.02) | 0.297   |
| 6.3%-10.8%                                      | 0.83 (0.81 to 0.86) | < 0.001 | 0.97 (0.93 to 1.02) | 0.155   |
| Less than 6.3%                                  | 0.74 (0.71 to 0.77) | < 0.001 | 0.92 (0.88 to 0.98) | 0.002   |
| Geographic Classification (Ref: Metropolitan)   |                     |         |                     |         |
| Urban                                           | 0.97 (0.94 to 1.01) | 0.123   | 0.98 (0.94 to 1.03) | 0.445   |
| Rural                                           | 0.92 (0.83 to 1.03) | 0.115   | 0.88 (0.79 to 1.00) | 0.025   |
| Facility Type (Ref: Academic)                   |                     |         |                     |         |
| Community Cancer Program                        | 2.17 (2.01 to 2.30) | < 0.001 | 1.74 (1.62 to 1.86) | < 0.001 |
| Comprehensive Community Cancer Program          | 1.54 (1.50 to 1.59) | < 0.001 | 1.40 (1.37 to 1.46) | < 0.001 |
| Integrated Network                              | 1.29 (1.24 to 1.34) | < 0.001 | 1.25 (1.20 to 1.30) | < 0.001 |
| US Region (Ref: Northeast)                      |                     |         |                     |         |
| Midwest                                         | 1.05 (1.01 to 1.09) | 0.019   | 1.02 (0.98 to 1.06) | 0.267   |
| South                                           | 1.21 (1.17 to 1.25) | < 0.001 | 1.07 (1.03 to 1.11) | < 0.001 |
| West                                            | 1.10 (1.06 to 1.14) | < 0.001 | 1.02 (0.97 to 1.06) | 0.368   |
| Charlson/Deyo Comorbidity Score (Ref: 0-1)      |                     |         |                     |         |
| 2                                               | 0.77 (0.74 to 0.80) | < 0.001 | 0.86 (0.82 to 0.89) | < 0.001 |
| 3 or More                                       | 0.83 (0.81 to 0.86) | < 0.001 | 0.85 (0.82 to 0.88) | < 0.001 |
| MELD (per 10 unit)                              | 1.17 (1.15 to 1.19) | < 0.001 | 1.09 (1.07 to 1.10) | < 0.001 |
| Tumor Size (cm)                                 | 1.10 (1.09 to 1.10) | < 0.001 | 1.04 (1.03 to 1.04) | < 0.001 |
| Year of Diagnosis                               | 0.94 (0.93 to 0.94) | < 0.001 | 0.93 (0.93 to 0.94) | < 0.001 |
| Diagnosis Method (Ref: Cytology or Histology)   |                     |         |                     |         |
| Clinical Diagnosis                              | 1.23 (1.20 to 1.27) | < 0.001 | 1.45 (1.41 to 1.49) | < 0.001 |
| Cirrhosis (Ref: No cirrhosis)                   | 1.05 (1.03 to 1.09) | 0.001   | 1.05 (1.01 to 1.08) | 0.009   |
| TNM Composite Stage (Ref: Stage 1)              |                     |         |                     |         |
| Stage 2                                         | 1.36 (1.32 to 1.41) | < 0.001 | 1.38 (1.33 to 1.42) | < 0.001 |
| Stage 3                                         | 3.06 (2.96 to 3.17) | < 0.001 | 2.52 (2.43 to 2.62) | < 0.001 |
| Stage 4                                         | 3.78 (3.62 to 3.91) | < 0.001 | 3.10 (2.97 to 3.23) | < 0.001 |

MELD: Model for End-Stage Liver Disease; TNM: tumor, nodes, metastases
